# Supplementary material for: Ultrasonic-electrodeposition of hierarchical flower-like cobalt on petalage-like graphene hybrid microstructures for hydrazine sensing
Source: Royal Society of Chemistry journal article supplement (doi:10.1039/c2an35672d), 2012-01-01
Supplement: c2an35672d.pdf [file c2an35672d.pdf]

# Supporting Information

For analyst

Ultrasonic–electrodeposition of hierarchical flower–like cobalt on  
petalage–like graphene hybrid microstructures for hydrazine sensing

Yaping He, Jianbin Zheng\* and Sheying Dong

## 1. Transmission electron microscopy (TEM) imaging

Fig S1.A showed image of the flake–like shape nano–thickness GE. The GE film was relatively flat with a terraced morphology. For Co–GE, GE serves as the ground substance for the growth of Co, just as shown in Fig S1. B. And we also can confirm that the electrodeposition method produce graphene just as chemical method in both GE and Co–GE.

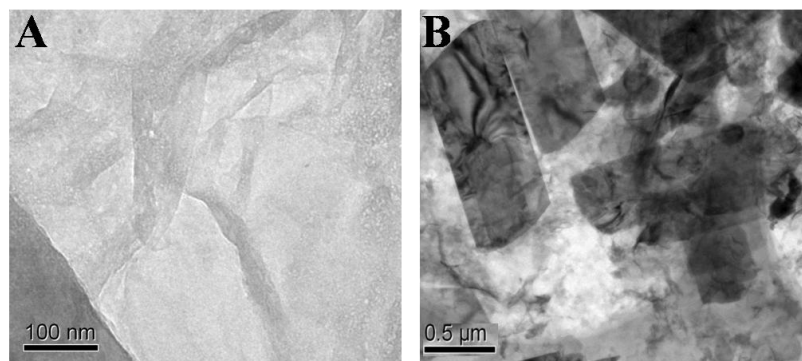

Fig S1. TEM images of (A) GE and (B) Co–GE.

---

\* Corresponding author. Tel. & Fax: +86 29 88303448.  
E-mail: zhengjb@nwu.edu.cn
